# Supplementary material for: Deciphering the chronology of copy number alterations in Multiple Myeloma
Source: PubMed Central journal article supplement (PMC6435669; doi:10.1038/s41408-019-0199-3), 2019-03-26

A

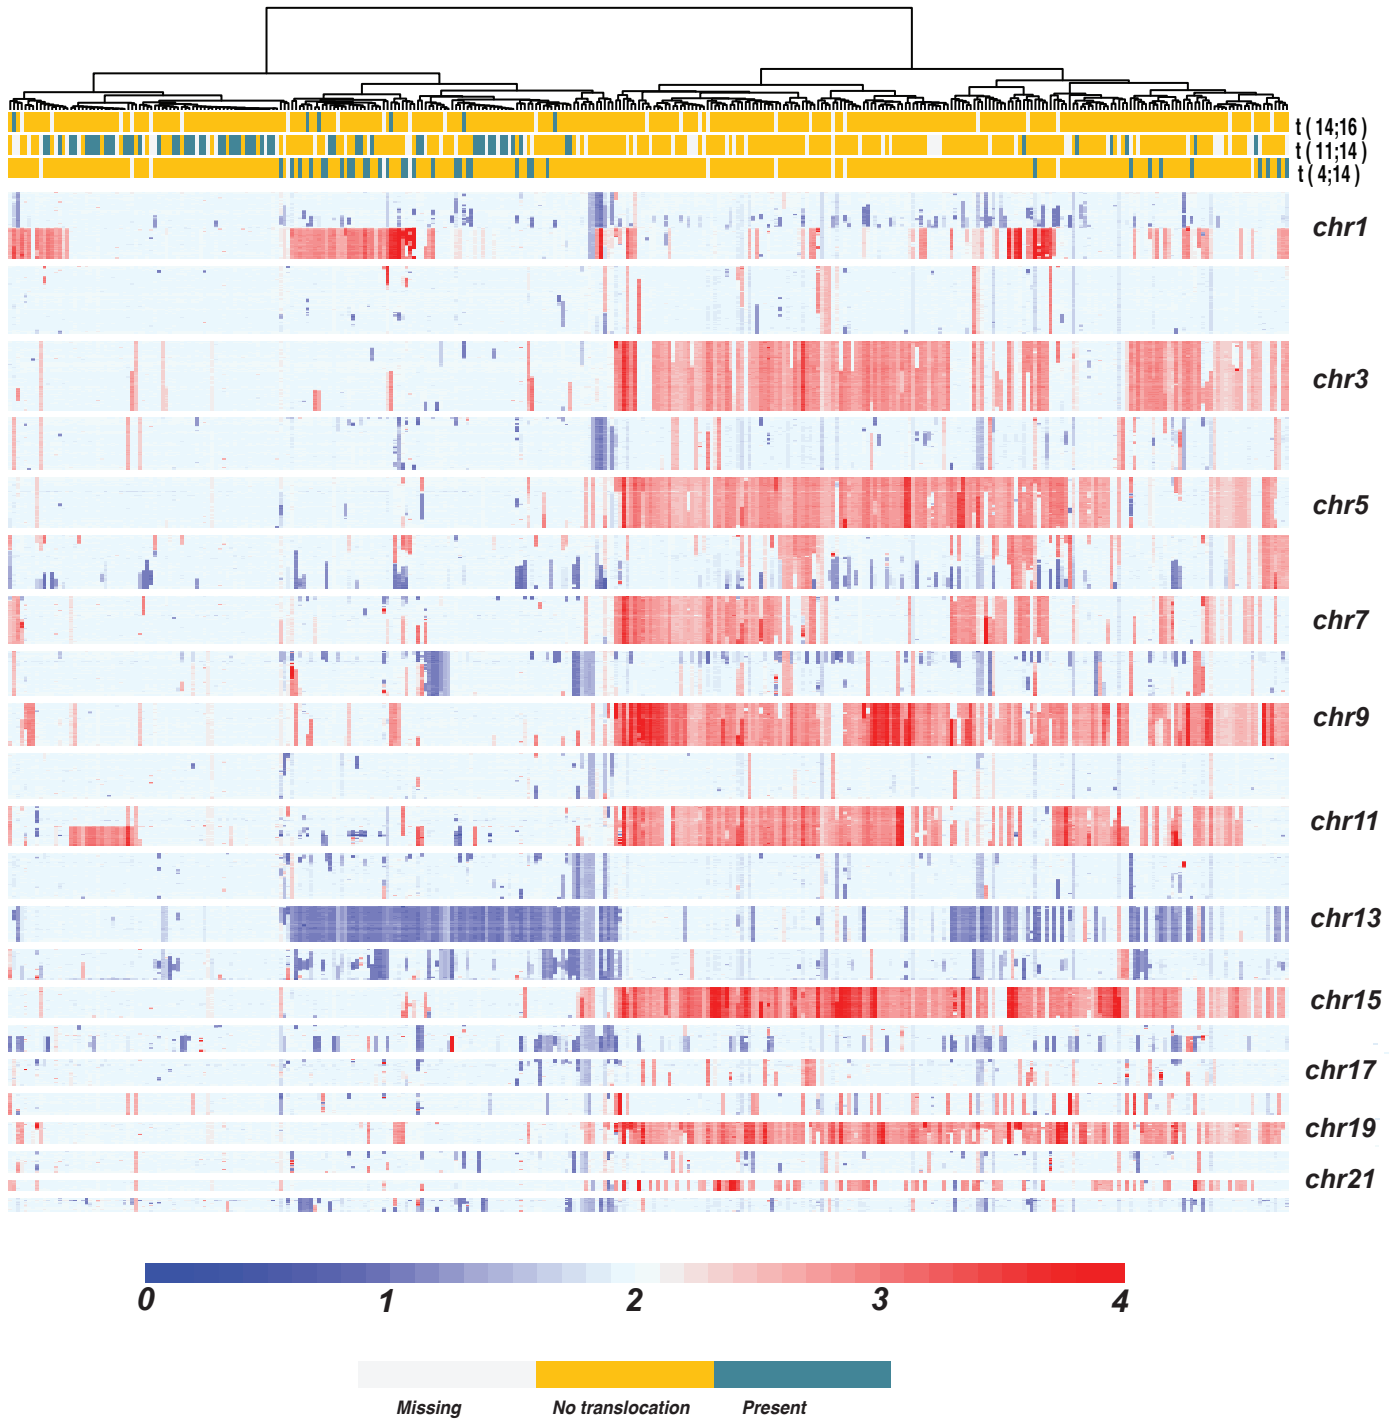

B

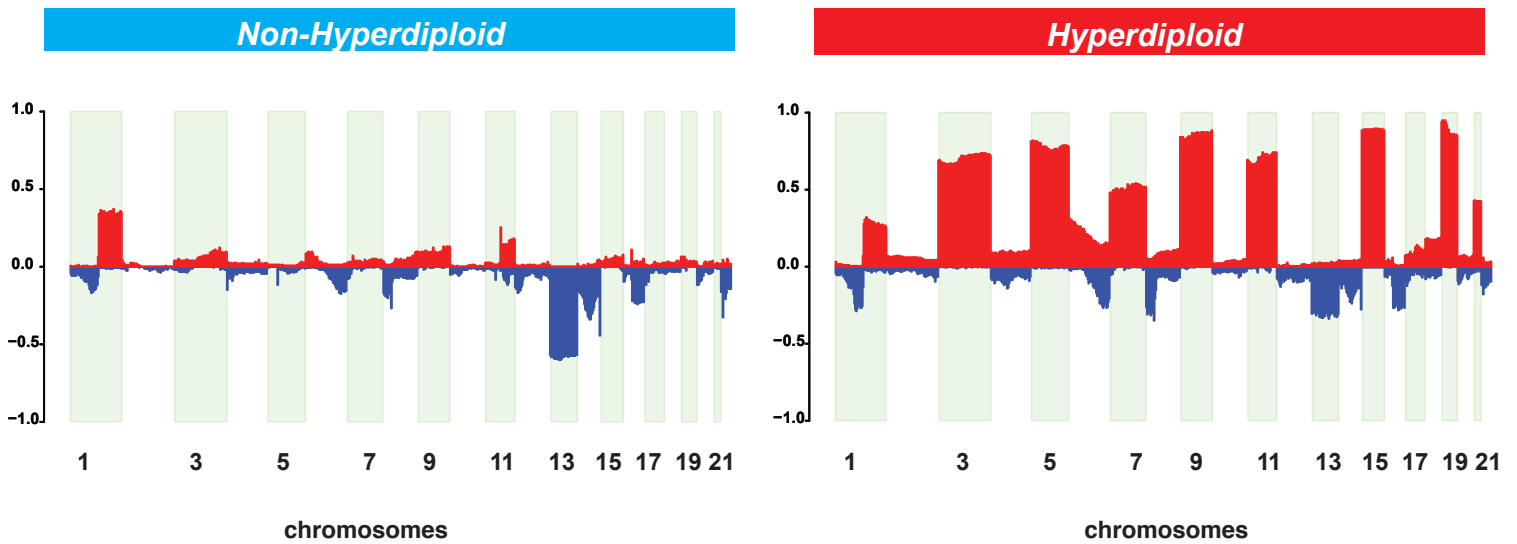

Supplement: 41408_2019_199_MOESM3_ESM.pdf [file 41408_2019_199_MOESM3_ESM.pdf]
